# Supplementary figures and images for: Optimization of New Catalytic Topoisomerase II Inhibitors as an Anti-Cancer Therapy
Source: MDPI journal article supplement (doi:10.3390/cancers13153675), 2021-07-22

Figure 2

A

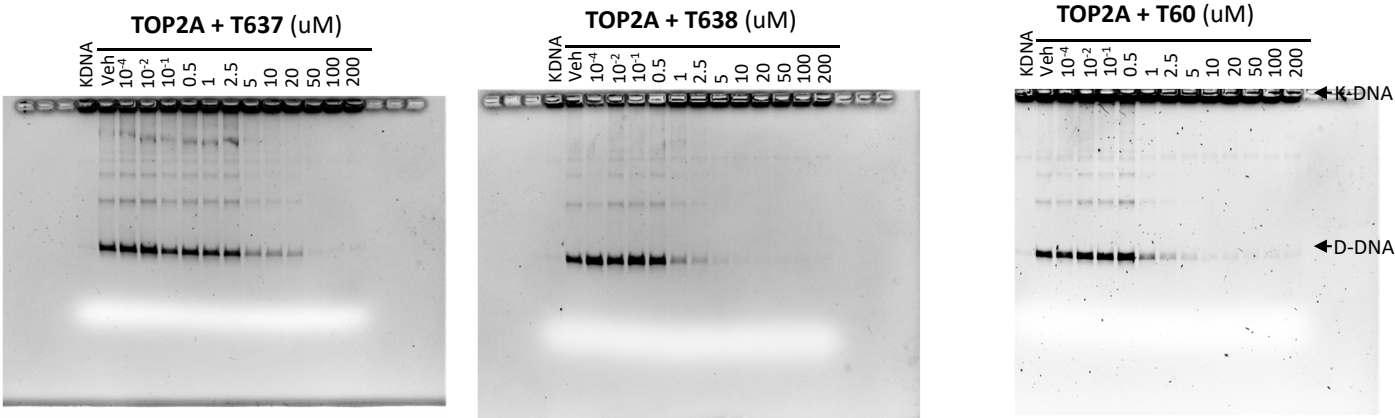

B

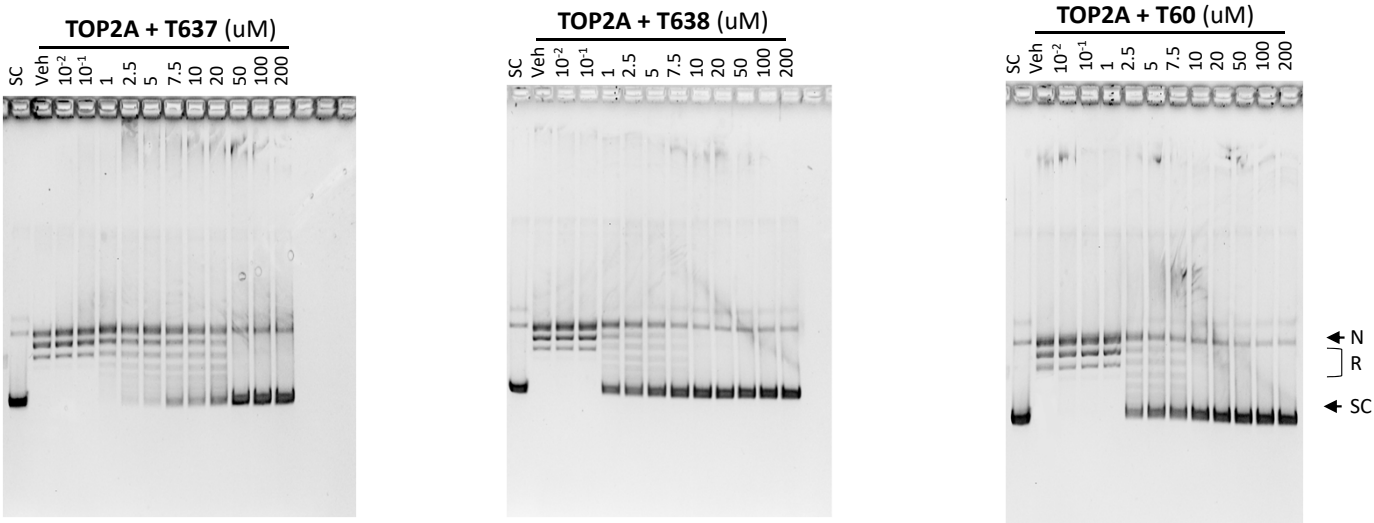

Figure 3

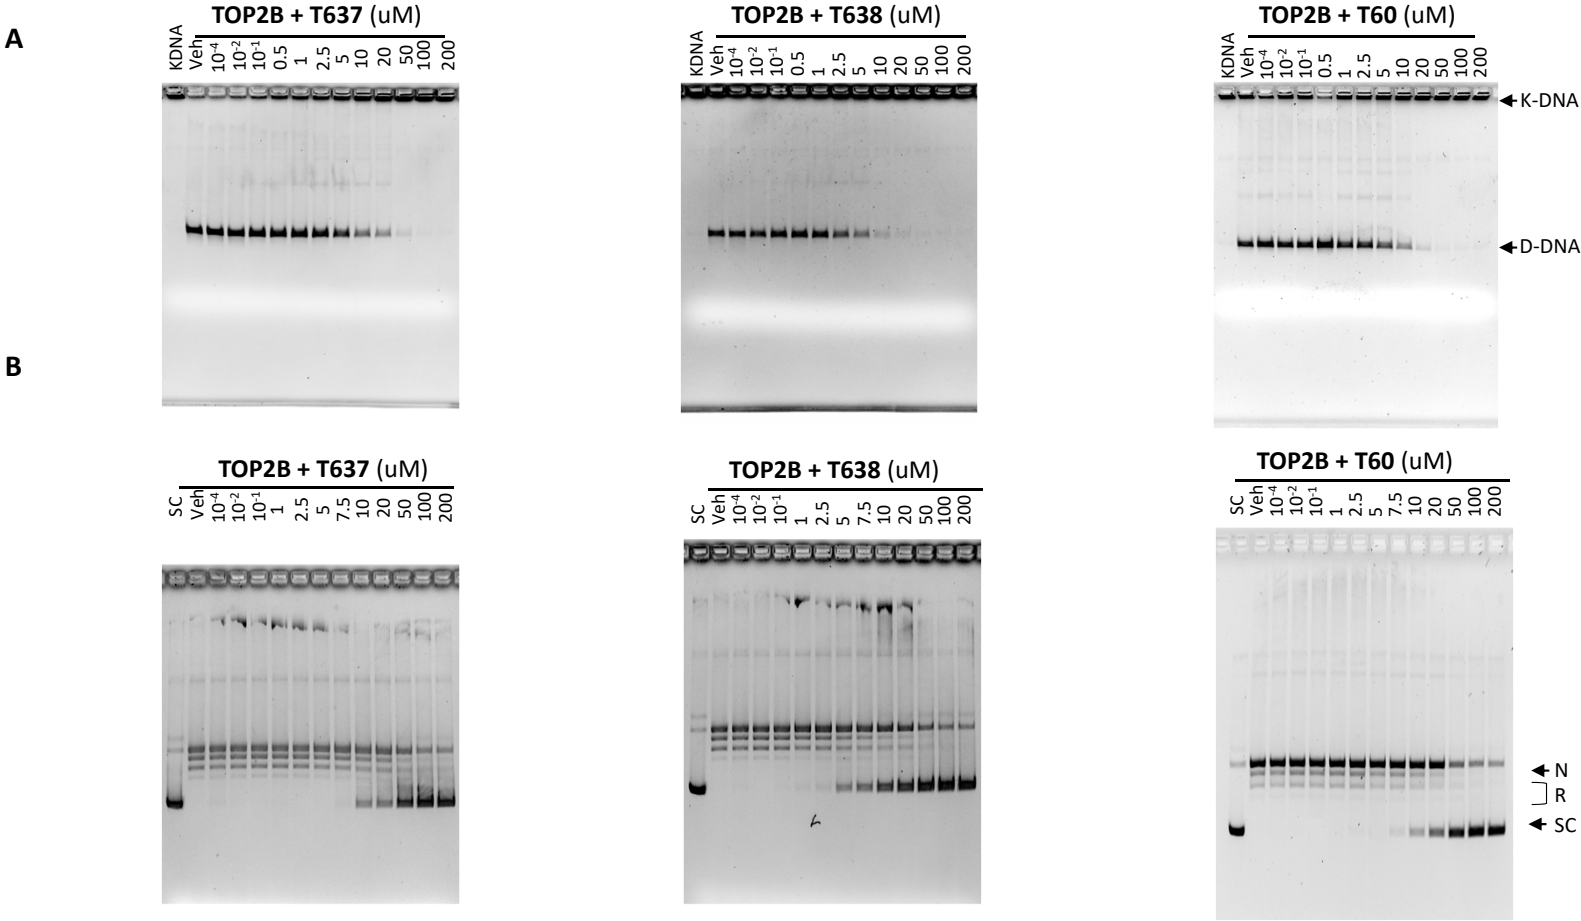

Figure 5

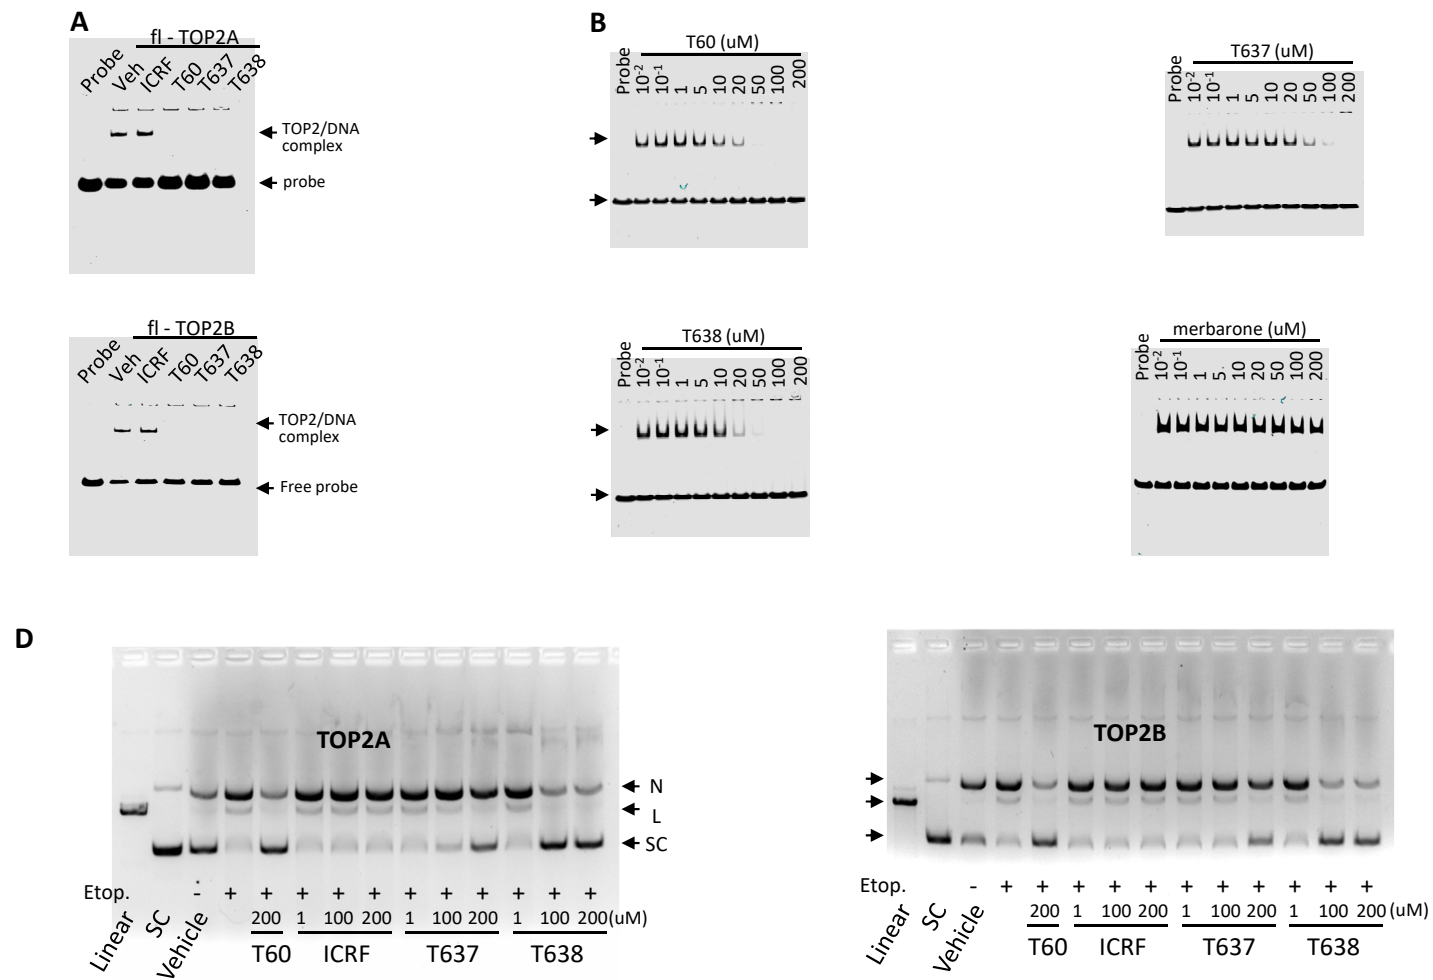

Figure 6

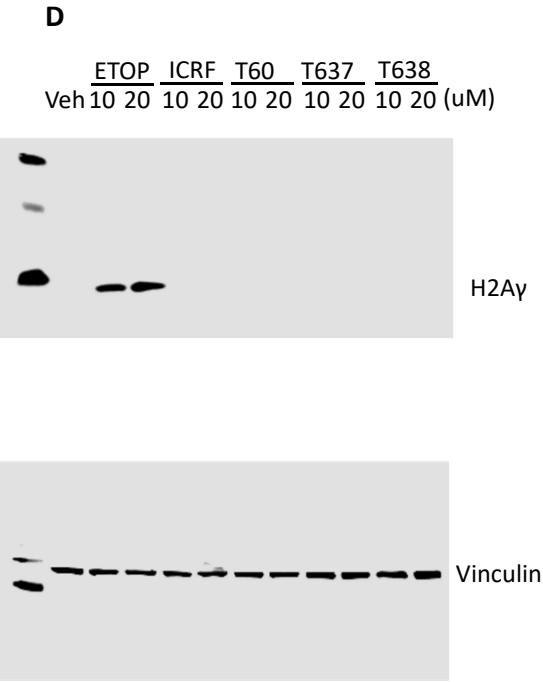

Supplement: s1 [file s1]
